# Supplementary material for: Ternary Ni–Al–Fe catalysts for ethanol steam reforming
Source: Royal Society of Chemistry journal article supplement (doi:10.1039/c3cy00989k), 2014-01-01
Supplement: c3cy00989k.pdf [file c3cy00989k.pdf]

## Supporting Information

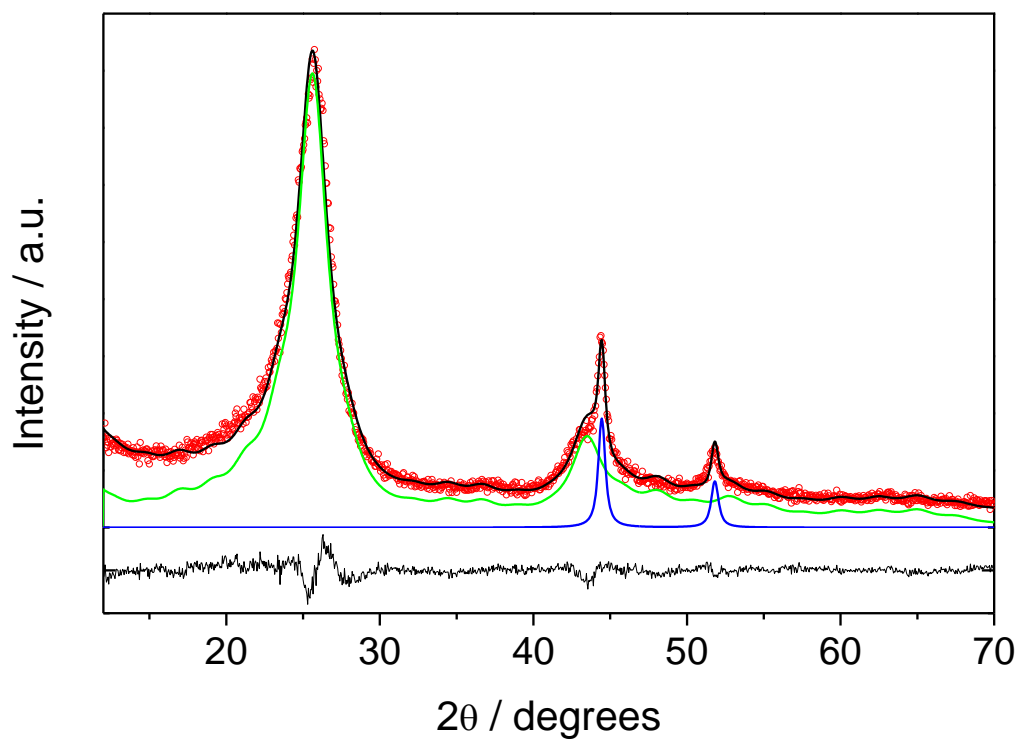

**Figure S1.** Observed (circles), calculated (continuous lines) and difference diffractograms obtained with TOPAS software for the sample  $\text{Ni}_3\text{Al}_{0.8}\text{Fe}_{0.2}\text{-U}$  with Ni and a model for non-crystalline carbon used in the quantitative PONCKS method (Ni 3.14 wt.%, non-crystalline carbon 96.86 wt.%). Conventional Rietveld agreement factor,  $R_{\text{wp}}$  8.13.
